# Supplementary material for: Rapid microwave-assisted synthesis and characterization of a novel CuCoTe nanocomposite material for optoelectronic and dielectric applications
Source: Royal Society of Chemistry journal article supplement (doi:10.1039/d4nr00081a), 2024-01-01
Supplement: d4nr00081a1.pdf [file d4nr00081a1.pdf]

**Supporting information**

**Rapid Microwave-Assisted Synthesis and  
Characterization of a Novel CuCoTe Nanocomposite  
Material for Optoelectronic and Dielectric  
Applications**

S. Supriya<sup>1</sup>, S. Das<sup>1</sup>, S. K. Samal<sup>2</sup>, S. Senapati<sup>1\*</sup>, R. Naik<sup>1\*</sup>

<sup>1</sup>Department of Engineering and Materials Physics, Institute of Chemical Technology-Indian Oil  
Odisha Campus, Bhubaneswar, 751013, India

<sup>2</sup>Department of Electronics and Communication Engineering, ITER, Siksha 'O' Anusandhan  
(Deemed to be University), Bhubaneswar 751030, India

\*Corresponding authors: [subrata.uu@gmail.com](mailto:subrata.uu@gmail.com); [ramakanta.naik@gmail.com](mailto:ramakanta.naik@gmail.com)

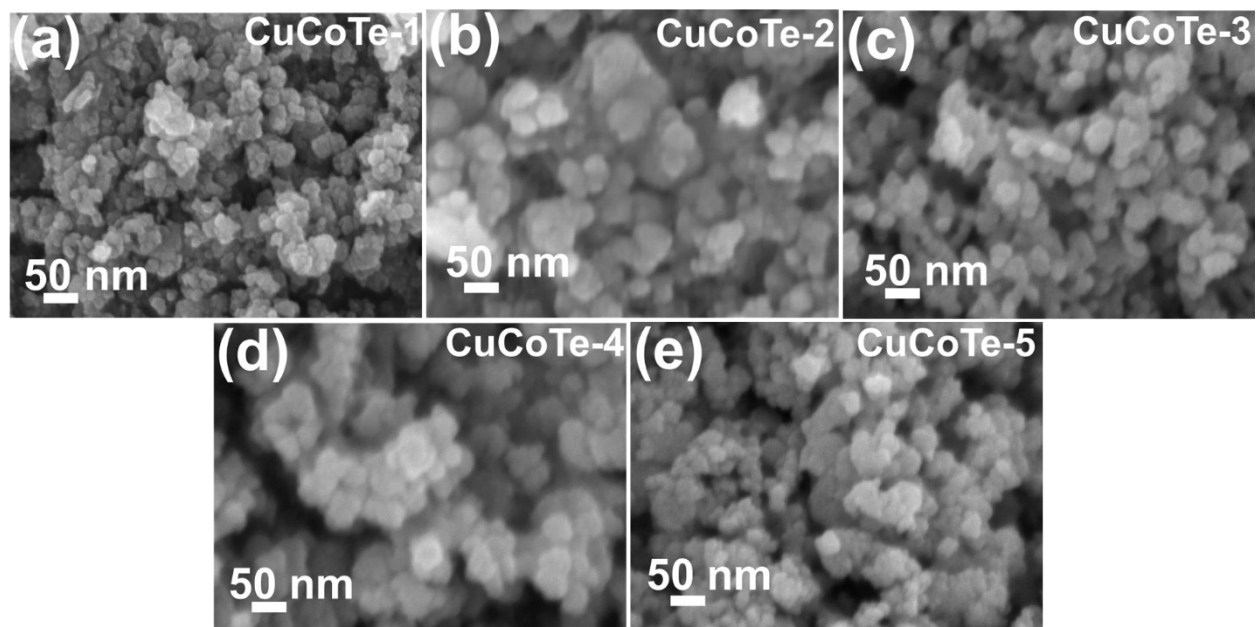

**Fig. S1** FESEM images of CuCoTe nanocomposites (a) CuCoTe-1, (b) CuCoTe-2, (c) CuCoTe-3, (d) CuCoTe-4, and (e) CuCoTe-5 at 50 nm (synthesized at 180 W).

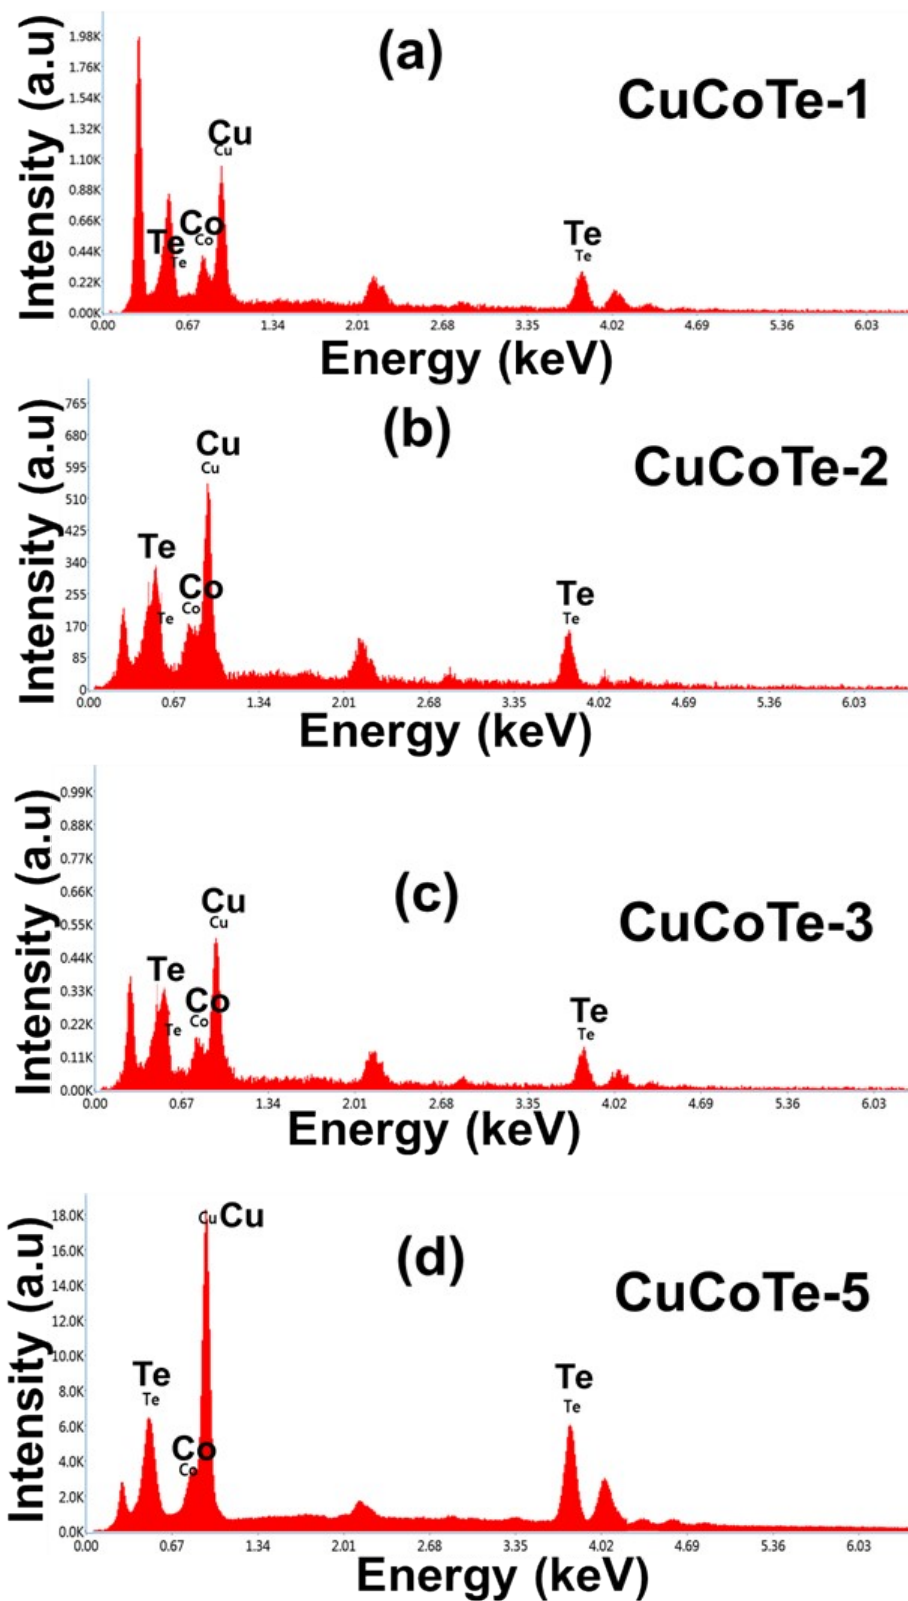

**Fig. S2** EDX spectra of CuCoTe nanocomposites (a) CuCoTe-1, (b) CuCoTe-2, (c) CuCoTe-3, and (d) CuCoTe-5 (synthesized at 180 W).

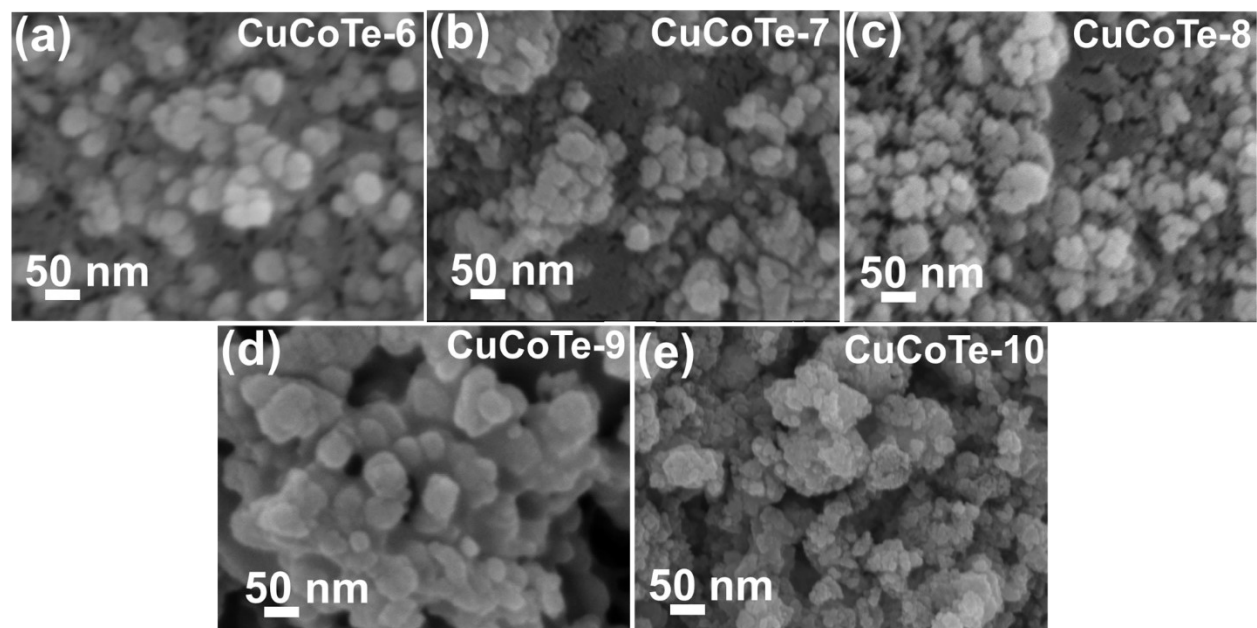

**Fig. S3** FESEM images of CuCoTe nanocomposites (a) CuCoTe-6, (b) CuCoTe-7, (c) CuCoTe-8, (d) CuCoTe-9, and (e) CuCoTe-10 at 50 nm (synthesized at 360 W).

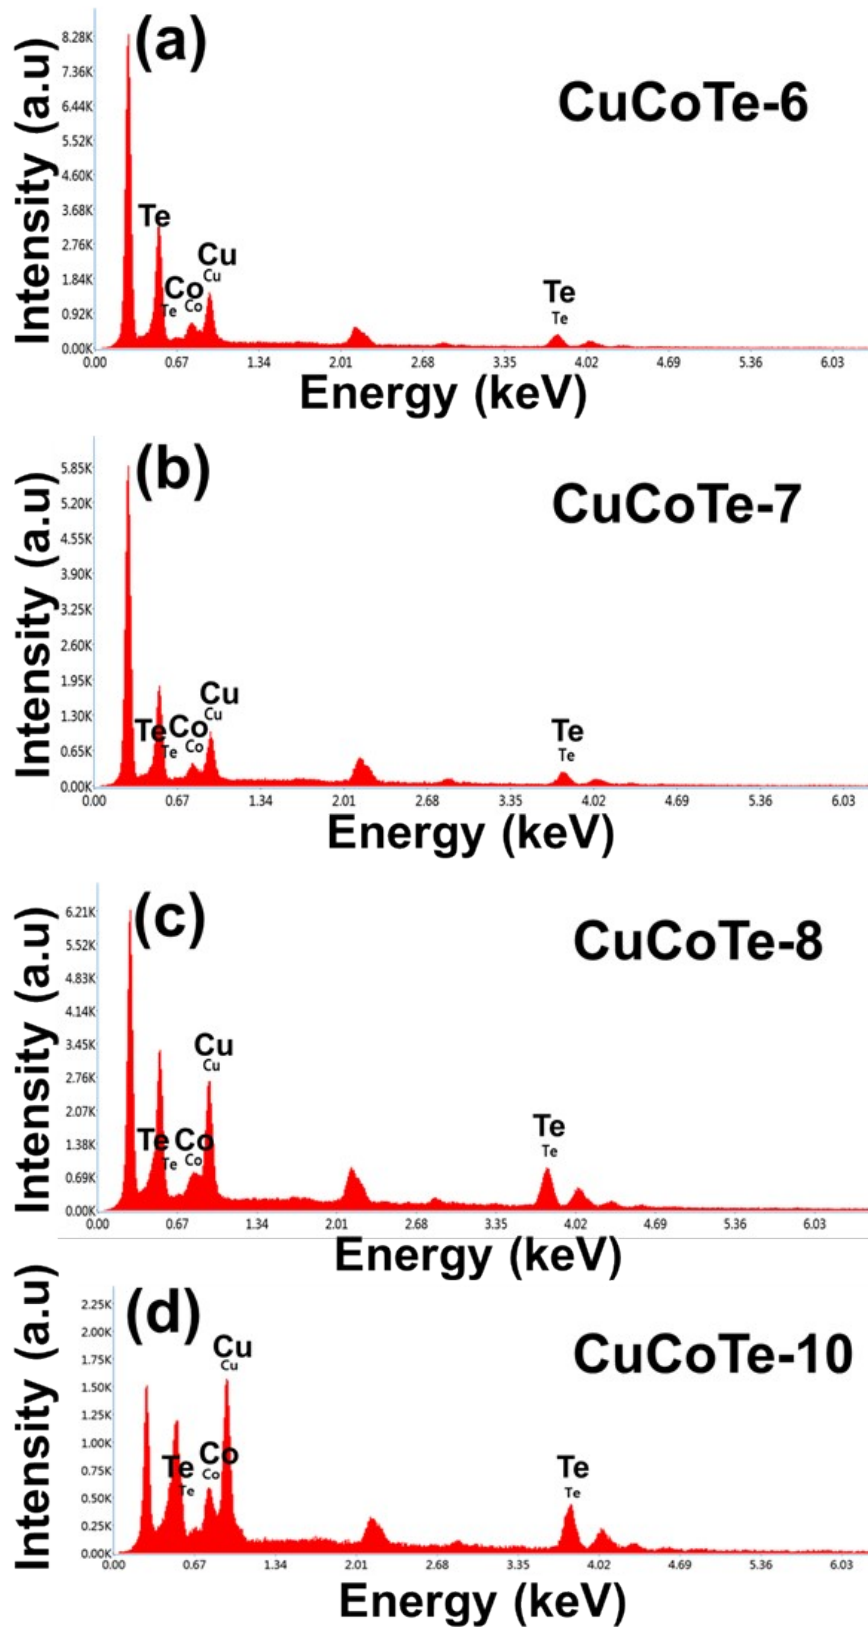

**Fig. S4** EDX spectra of CuCoTe nanocomposites (a) CuCoTe-6, (b) CuCoTe-7, (c) CuCoTe-8, and (d) CuCoTe-10 (synthesized at 360 W).

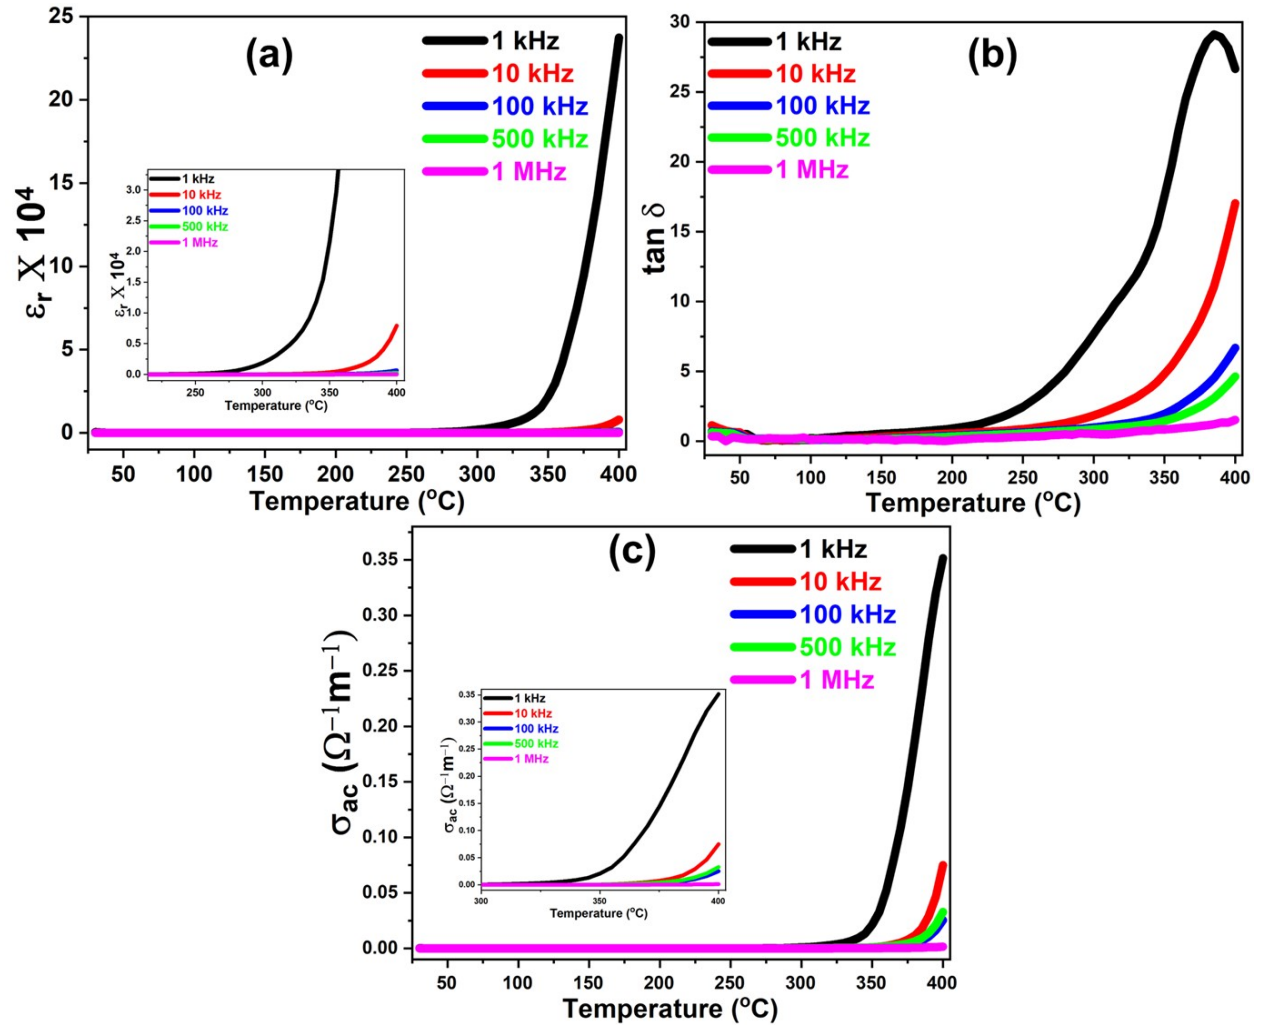

**Fig. S5** Variation of (a)  $\epsilon_r$ , (b)  $\tan \delta$ , and (c)  $\sigma_{ac}$  of CuCoTe-10 sample with temperature at different frequencies.

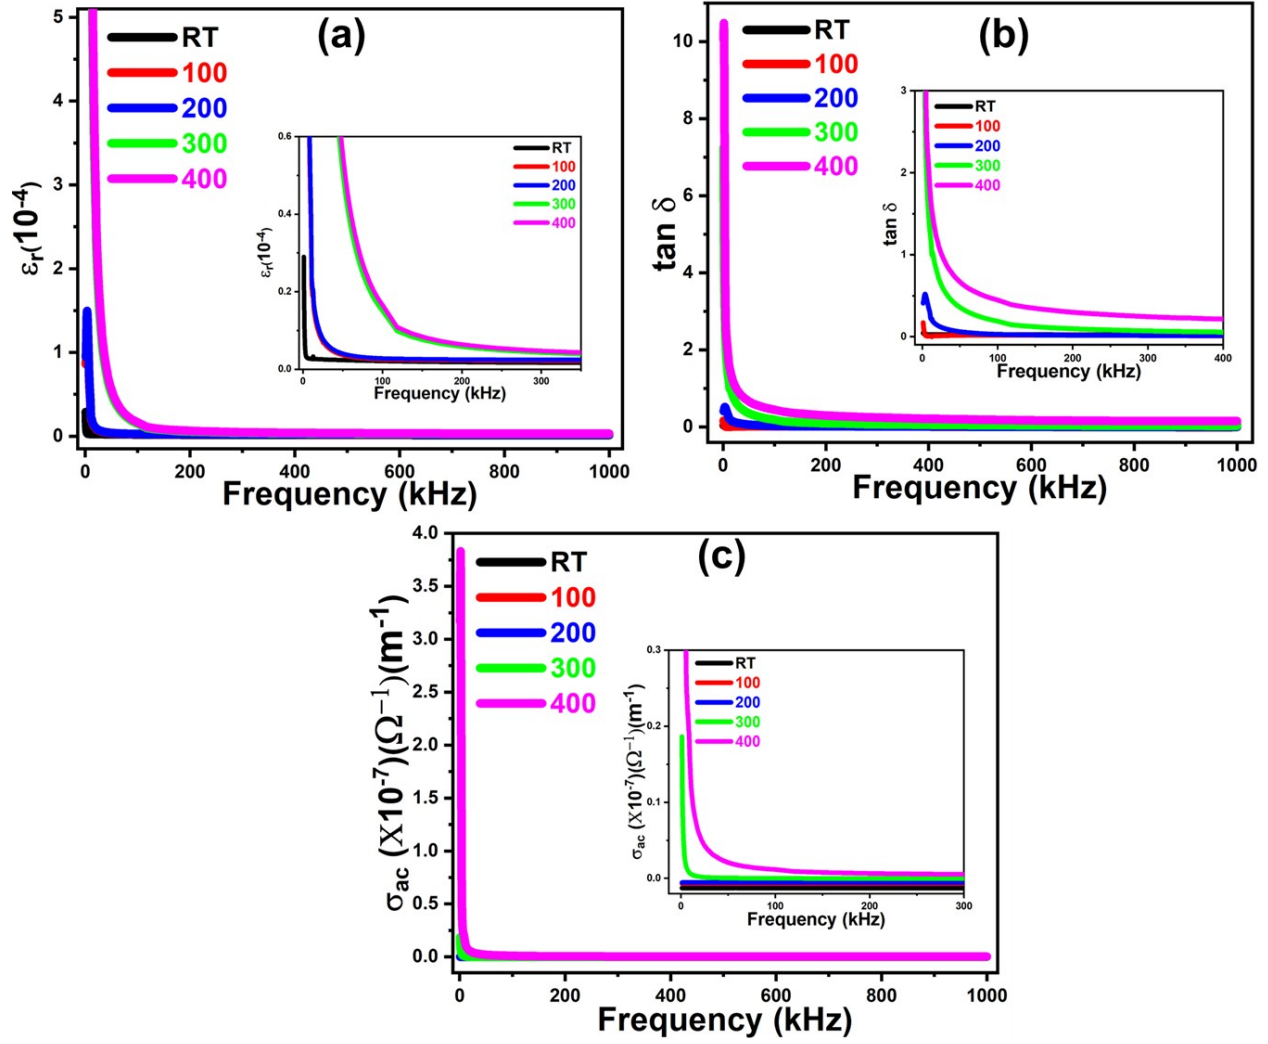

**Fig. S6** Variation of (a)  $\epsilon_r$ , (b)  $\tan \delta$ , and (c)  $\sigma_{ac}$  of CuCoTe-10 sample with frequency at different temperatures.

**Table S1: Comparison of materials for optoelectronic and dielectric applications.**

| Sl. No. | Material                               | Applications   |                                                                                                                                                                | Reference |
|---------|----------------------------------------|----------------|----------------------------------------------------------------------------------------------------------------------------------------------------------------|-----------|
| 1       | Cu <sub>2</sub> Te                     | Optoelectronic | Photodetector:<br>Detectivity: $1.3 \times 10^9$ Jones<br>Detection range: 600-1500                                                                            | 1         |
| 2       | Cu <sub>2</sub> Te                     | Optoelectronic | Direct band gap: 2.04 eV<br>Indirect band gap: 3.05 eV                                                                                                         | 2         |
| 3       | CoTe <sub>2</sub>                      | Dielectric     | Absorption property: 0.2 -2.0 THz                                                                                                                              | 3         |
| 4       | CuInZnSe <sub>3</sub>                  | Dielectric     | In the temp. range $60\text{ }^\circ\text{C} < T < 150\text{ }^\circ\text{C}$ , passive carriers inside the material are activated by energy from the outside. | 4         |
| 5       | Cu <sub>2-x</sub> Te                   | Dielectric     | The charge–discharge current density of the battery kept stable at around 90 mAhg <sup>-1</sup> even after 5000 cycles.                                        | 5         |
| 6       | Bi <sub>2</sub> Te <sub>3</sub> /G     | Dielectric     | Li-ion batteries:<br>Charge capacity- 158 mAh g <sup>-1</sup>                                                                                                  | 6         |
| 7       | CdTe                                   | Optoelectronic | Used as absorber layer in CdTe                                                                                                                                 | 7         |
| 8       | PbTe                                   | Optoelectronic | Solar cell:<br>Quantum efficiency:<br>above 120% (external)<br>exceeding 150 % (internal)                                                                      | 8         |
| 9       | MoTe <sub>2</sub> -based photodetector | Optoelectronic | Photodetector:<br>Detection range: 0.6-1.55 $\mu\text{m}$ ,<br>stable and fast photo response                                                                  | 9         |



## References

- [1] B. S. Farag and S. A. Khodier, *Thin Solid Films*, 1991, **205**, 52-57.
- [2] P. Kumar and K. Singh, *Cryst. Growth Des.*, 2009, **9**, 3089–3094.
- [3] Z. Zhang, Z. Cai, L. Xia, D. Zhao, F. Fan and Y. Huang, *ACS Appl. Mater. Interfaces*, 2021, **13**, 30967–30979.
- [4] S. H. Jabarov, S. I. Ibrahimova, F. V. Hajiyeva, E. M. Huseynov, and Y. I. Aliyev, *Arab. J. Sci. Eng.*, 2022, **47**, 7817-7823.
- [5] C. Han, Z. Li, W. J. Li, S. L. Chou and S. X. Dou, *J. Mater. Chem. A*, 2014, **2**, 11683–11690.
- [6] F. Tu, J. Xie, G. Cao and X. Zhao, *Mater.*, 2012, **5**, 1275–1284.
- [7] S. Chander and M. S. Dhaka, *Mater. Sci. Semicond. Process*, 2015, **40**, 70–712.
- [8] M. L. Bohm, T. C. Jellicoe, M. Tabachnyk, N. J. Davis, F. Wisnivesky-Rocca-Rivarola, C. Ducati, B. Ehrler, A. A. Bakulin and N. C. Greenham, *Nano Lett.* 2015, **15**, 7987–7993.
- [9] H. Huang, J. Wang, W. Hu, L. Liao, P. Wang, X. Wang, F. Gong, Y. Chen, G. Wu and W. Luo, *Nanotechnology*, 2016, **27**, 445201.
